# Supplementary material for: Real-time optical detection of mercury contamination in drinking water using an amphiphilic recognition probe at liquid crystal/aqueous interfaces
Source: Royal Society of Chemistry journal article supplement (doi:10.1039/d4ay01482k), 2024-01-01
Supplement: d4ay01482k1.pdf [file d4ay01482k1.pdf]

## Supplementary Information File

Article- AY-ART-08-2024-001482

# **Real-Time Optical Detection of Mercury Contamination in Drinking Water using Amphiphilic Recognition Probe at Liquid Crystal/Aqueous Interface**

Satyabratt Pandey<sup>a</sup>, Madeeha Rashid<sup>a</sup>, Vishal Singh<sup>a</sup>, Garima Singh<sup>a</sup>, Chandan Bhai Patel<sup>b</sup>,  
Rohit Verma<sup>c</sup>, Dharm Dev<sup>d</sup>, Ranjan Kumar Singh<sup>b</sup> and Sachin Kumar Singh<sup>a\*</sup>

Email: [sachinsinghbhu@gmail.com](mailto:sachinsinghbhu@gmail.com)

---

<sup>a.</sup> Department of Chemistry, Deen Dayal Upadhyay Gorakhpur University, Gorakhpur, 273009, India.

<sup>b.</sup> Department of Physics, Institute of Science, BHU, Varanasi, 221005,

<sup>c.</sup> Department of Physics, Amity Institute of Applied Sciences, Amity University, Noida, India

<sup>d.</sup> Department of Pharmacology, G.S.V.M. Medical College, Kanpur, Uttar Pradesh- 208002

## Table of Contents

1. Instrumentation
2. Synthesis of DDC
3. Characterization of DDC
4. Supplementary Figures
  
- S1. <sup>1</sup>H NMR spectra of DDC in CDCl<sub>3</sub>
- S2. <sup>13</sup>C NMR spectra of DDC in CDCl<sub>3</sub>
- S3. IR spectra of DDC
- S4. Optical Texture of Mercury Anions
- S5. Stability assessment of LC-based sensors
- S6. Resonance Hybrid Structure of DDC and Hg-DDC Complex

## 1. Instrumentation

A polarizing microscope (B-510 POL, Optika, Italy) was used to image the optical textures of the 5CB film with a 10X objective and digital camera (CP6 Optika, Italy) at a resolution of 3072 x 2048 pixels, a gain of 1.2X, and a shutter speed of 1/10 s. Data analysis was performed according to the following procedure- Images of the LCs were first acquired using a polarizing optical microscope (POM) and then processed using Adobe Photoshop software to measure the intensity. Microsoft Excel and Origin 7.0 software were used for the numerical analysis, including the calculation of limit of detection (LOD) and reusability. We employed NMR instrument (Avance Neo 600 MHz, Bruker Insta Scientific) operating at 600 MHz to elucidate molecular structures and dynamics. The infrared spectra were recorded using an instrument (IR Spirit A224159, Shimadzu, Japan).

## 2. Synthesis of amphiphilic Dodecyldithiocarbamate surfactant derivatives (DDC)

20 ml of dry tetrahydrofuran (THF) were used to dissolve the primary n-dodecyl amine and KOH pellets (0.20g, 3.6mmol) were added to make the medium basic. After two hours of stirring, all of the KOH pellets were dissolved. Then, the resulting solution was placed in an ice bath and CS<sub>2</sub> (0.48 mL, 8.0 mmol) was gradually added with stirring. The reaction mixture was further stirred for 2 h. Then, we vacuumed out the solvent and washed it with diethyl ether and allowed it to dry. This compound was able to be dissolved in a range of organic solvents, including chloroform (CHCl<sub>3</sub>), tetrahydrofuran (THF), dichloromethane (DCM), and acetonitrile, and it also formed a colloidal suspension in water.

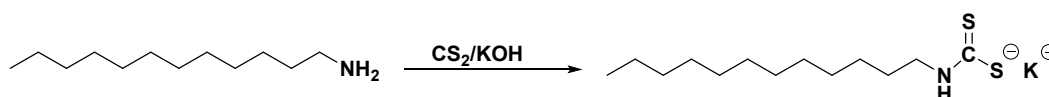

**Scheme 1:** Reaction condition -Dry THF (solvent), Temp (0-5<sup>0</sup>C)

Yield: 60%. IR (cm<sup>-1</sup>): 3206(N-H<sub>str</sub>); 2929, 2847 (C-H<sub>str</sub>); 1578 and 1371 (N-C=S<sub>str</sub>), 1008 and 960 (C-S<sub>str</sub>). NMR: <sup>1</sup>H NMR (600 MHz, CDCl<sub>3</sub>, ppm): 5.74 (s, 1H, NH), 3.54 (t, 2H, -NCH<sub>2</sub>), 1.71–1.26 (m, 20H, (CH<sub>2</sub>)<sub>10</sub>), 0.88 (t, 3H, CH<sub>3</sub>); <sup>13</sup>C NMR (150 MHz, CDCl<sub>3</sub>, ppm): 211.60 (-CS<sub>2</sub>), 48.21 (-NCH<sub>2</sub>), 29.67 (-CH<sub>2</sub>), 29.38, 28.99- 22.69 (-CH<sub>2</sub>)<sub>n</sub>, 14.12 (-CH<sub>3</sub>).

### 3. Characterization of amphiphilic Dodecyldithiocarbamate surfactant derivatives (DDC)

The detailed characterization of the developed probe was performed using  $^1\text{H}$  and  $^{13}\text{C}$  nuclear magnetic resonance (NMR) and Infra-red (IR) spectroscopic techniques to confirm the molecular structure and purity of the probe.

The  $^1\text{H}$  NMR spectrum of DDC in  $\text{CDCl}_3$  exhibits peaks at  $\delta$  5.74(s), 3.54(t), 1.71-1.26(m) and 0.88(t) with 1, 2, 20 and 3 protons respectively attributed to  $-\text{NH}$ ,  $-\text{NCH}_2$ ,  $-(\text{CH}_2)_{10}$  and  $-\text{CH}_3$  protons respectively.

The  $^{13}\text{C}$  NMR spectrum of DDC in  $\text{CDCl}_3$  exhibits characteristic peaks of  $-\text{CS}_2$ ,  $-\text{NCH}_2$ , long aliphatic carbons  $-(\text{CH}_2)_n$ , and  $-\text{CH}_3$  protons at  $\delta$  211.60, 54.46, 31.25-22.05 and 13.91 respectively.

The position of peaks in  $^1\text{H}$  and  $^{13}\text{C}$  NMR and expected number of protons in  $^1\text{H}$  NMR spectrum confirm the molecular structure and purity of the synthesized probe.

The absorption bands appearing at 3206; 2929, 2847; 1578 and 1371; 1008 and 960 in the FT-IR spectrum of DDC are attributed to  $\nu(\text{N-H}_{\text{str}})$ ,  $\nu(\text{C-H}_{\text{str}})$ ,  $\nu(\text{N-C=S}_{\text{str}})$  and  $\nu(\text{C-S}_{\text{str}})$  modes respectively. The occurrence of characteristic  $-\text{NH}$  stretching vibration bands at 3206  $\text{cm}^{-1}$  and strong absorption of  $-\nu(\text{N-C=S}_{\text{str}})$  at 1578 and 1371  $\text{cm}^{-1}$  clearly reveal the formation of  $-(\text{NH-CS}_2)$  polar head group of the amphiphile whereas strong absorption bands at 2929 and 2847  $\text{cm}^{-1}$  confirms the presence of non-polar part *i.e.* long aliphatic chains of the probe.

## 4. Supplementary figures

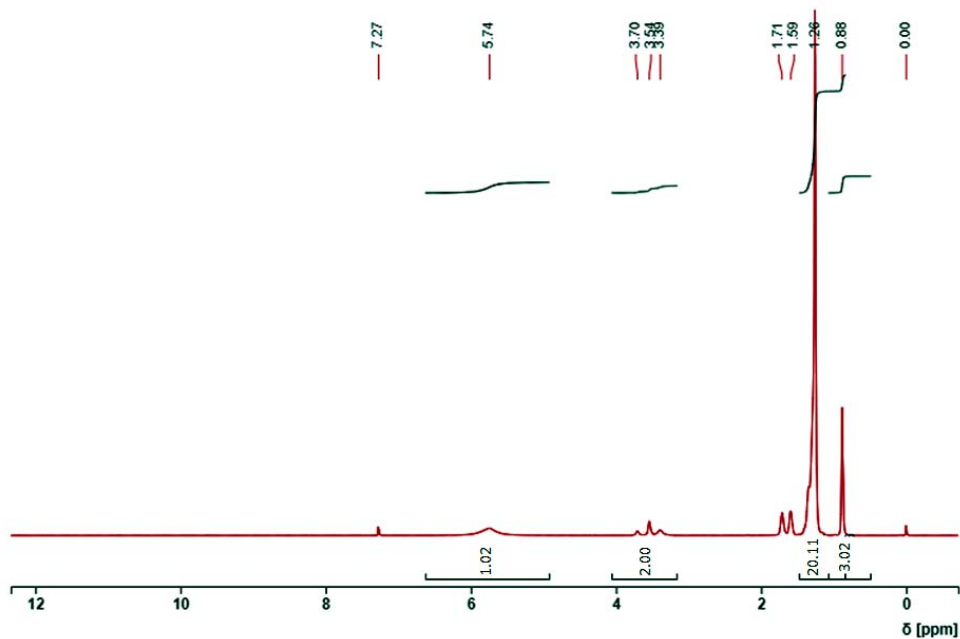

Figure S1.  $^1\text{H}$  NMR spectra of DDC in  $\text{CDCl}_3$ .

$^1\text{H}$  NMR (600 MHz,  $\text{CDCl}_3$ , ppm): 5.74 (s, 1H, NH), 3.54 (t, 2H,  $-\text{NCH}_2$ ), 1.71–1.26 (m, 20H,  $(\text{CH}_2)_{10}$ ), 0.88 (t, 3H,  $\text{CH}_3$ ).

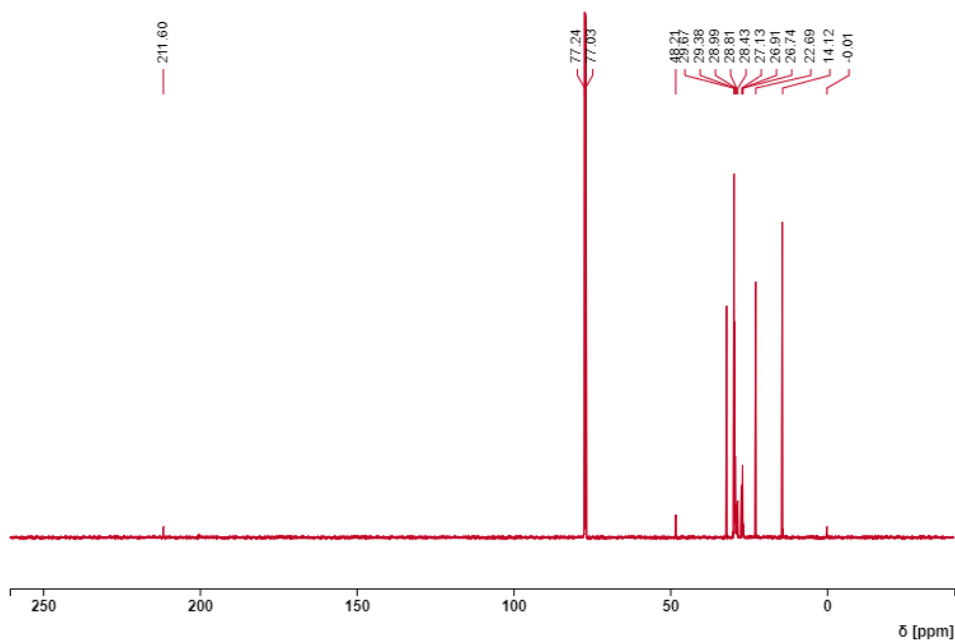

Figure S2.  $^{13}\text{C}$  NMR spectra of DDC in  $\text{CDCl}_3$ .

$^{13}\text{C}$  NMR (150 MHz,  $\text{CDCl}_3$ , ppm): 211.60 ( $-\text{CS}_2$ ), 48.21 ( $-\text{NCH}_2$ ), 29.67 ( $-\text{CH}_2$ ), 29.38, 28.99–22.69 ( $-\text{CH}_2$ )<sub>n</sub>, 14.12 ( $-\text{CH}_3$ ).

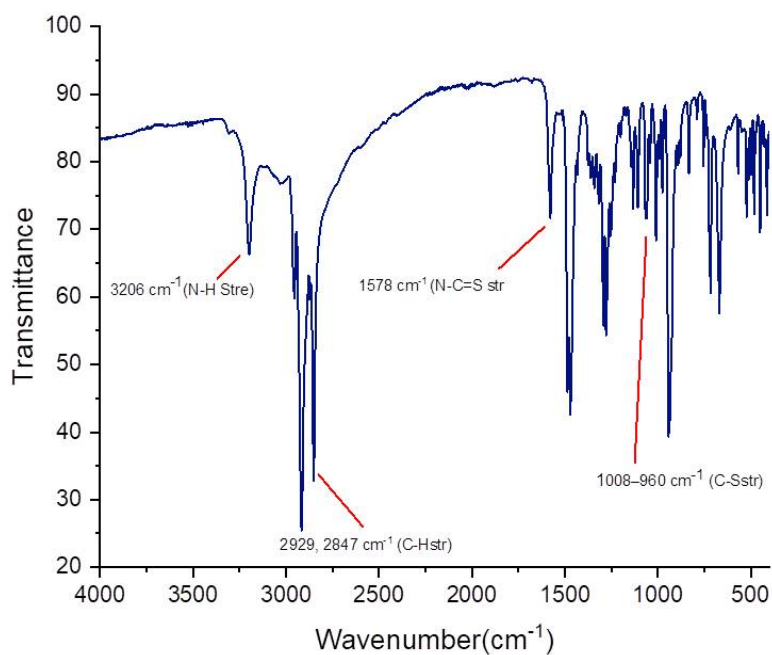

1

**Figure S3. IR spectra of DDC surfactant**

**IR (cm<sup>-1</sup>):** 3206(N-H<sub>str</sub>); 2929, 2847 (C-H<sub>str</sub>); 1578 and 1371 (N-C=S<sub>str</sub>), 1008 and 960 (C-S<sub>str</sub>).

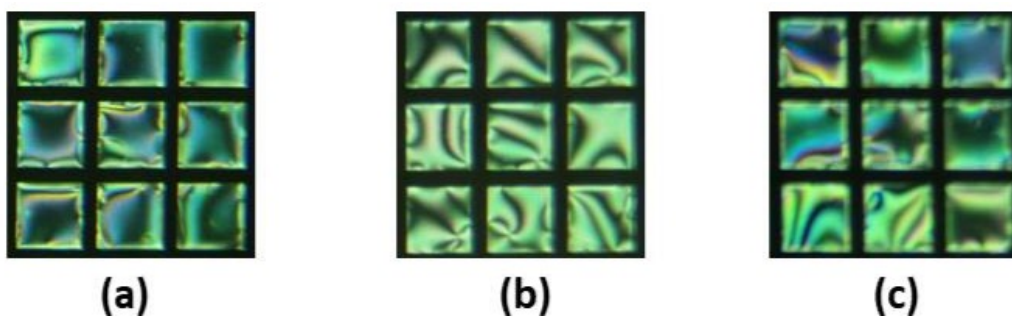

**Figure S4:** Cross-polarized optical pictures of 5CB doped with 0.4 mM of surfactant (DDC) submerged in an aqueous solution containing 1.0 mM of (a) HgSO<sub>4</sub> (b) HgCl<sub>2</sub> (c) Hg(NO<sub>3</sub>)<sub>2</sub>

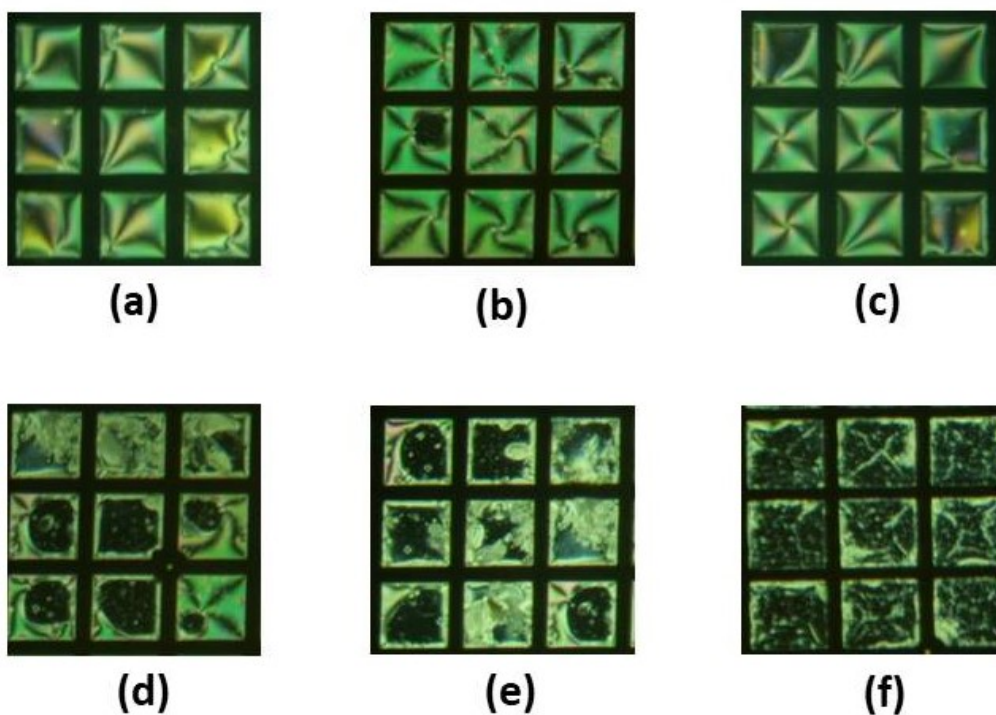

**Figure S5:** The stability assessment of LC-based sensors involved utilizing pre-prepared sensors stored in an air environment for varying durations **(a)** 1 Day **(b)** 2 Day **(c)** 3 Days **(d)** 4 Days **(e)** 5 Days **(f)** 6 Days

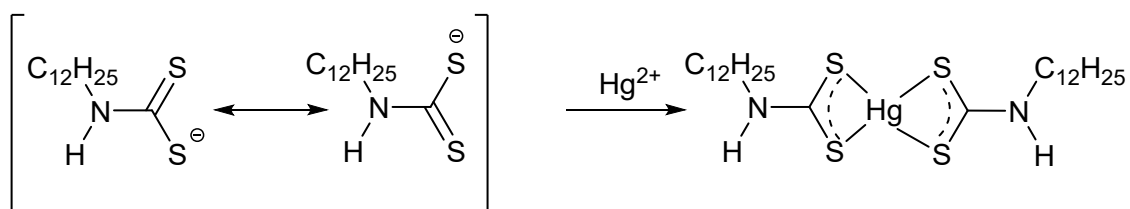

**Figure S6:** Resonance Hybrid Structure of DDC and Hg-DDC Complex

\*\*\*\*\*
